# Supplementary material for: Metalloproteinase regulation improves in vitro generation of efficacious platelets from mouse embryonic stem cells
Source: PubMed Central journal article supplement — J Exp Med. 2008 Aug 4;205(8):1917–27. doi: 10.1084/jem.20071482 (PMC2525582; doi:10.1084/jem.20071482), 2008-08-04
Supplement: jem.20071482_3.pdf [file jem.20071482_3.pdf]

**Table S1.**

|               |                                                                |
|---------------|----------------------------------------------------------------|
| GAPDH         | 5'-CTTCACCACCATGGAGAAGGC-3',<br>5'-GGCATGGACTGTGGTCAT-3'       |
| GATA-1        | 5'-AAAGATGGAATCCAGACGAGG-3'<br>5'-GTCAAGGCTATTCTGTGTACC-3'     |
| GATA-2        | 5'-AGTGCATGCAAGAGAAGTCAC-3'<br>5'-ATGGCAGTCACCATGCTGGAC-3'     |
| FOG-1         | 5'-AACTGTGAACGCCATCTCAAGG-3'<br>5'-TGTGCATCAGCGAGTGCTGTTG-3'   |
| Fli-1         | 5'-GCAGCATCACAATACTGGACC-3',<br>5'-GCTGGAACCTCAGCCAGAAGG-3'    |
| NF-E2         | 5'-GGCAAGAACAAGGTGGCAGCC-3'<br>5'-ATCTGTAGCCTCCATTTTGGT-3'     |
| GPIb $\alpha$ | 5'-CCTGGAAGAAGCTCTGTTCTCC-3',<br>5'-CATTGGTCTGCAGGCTCGTC-3'    |
| GPV           | 5'-TGCCTACGAACCTCACACACATC-3',<br>5'-GCTTAACTTGAGCCCCAAGCAG-3' |
| GAPDH         | 5'-CTTCACCACCATGGAGAAGGC-3',<br>5'-GGCATGGACTGTGGTCAT-3'       |
